# Supplementary material
Source: Springer Nature journal article supplement (https://www.springermedizin.de/resource/supplementary/12970_2007_47_MOESM10_ESM.pdf/9594242)
Supplement: MOESM10 [file 9594242]

| Motivation for AAS Use      | N    | Mean Rating* | SD   |
|-----------------------------|------|--------------|------|
| Increase muscle mass        | 1821 | 4.71         | 0.6  |
| Increase strength           | 1797 | 4.28         | 0.91 |
| To look good                | 1798 | 4.19         | 1.06 |
| Increase confidence         | 1775 | 3.578        | 1.37 |
| Decrease fat                | 1790 | 3.576        | 1.26 |
| Improve mood                | 1765 | 3.23         | 1.46 |
| Attract sexual partners     | 1772 | 3.16         | 1.51 |
| Prevent injury              | 1754 | 2.969        | 1.45 |
| Recreational weightlifting  | 1718 | 2.968        | 1.41 |
| Increase endurance          | 1759 | 2.79         | 1.47 |
| Amateur bodybuilding        | 1754 | 2.27         | 1.47 |
| Amateur/recreational sports | 1729 | 2.11         | 1.33 |
| Power lifting               | 1733 | 2.01         | 1.36 |
| Professional bodybuilding   | 1721 | 1.6          | 1.13 |
| Professional sports         | 1728 | 1.45         | 1.06 |

\*Rating scale = 1 (not a reason for use), 2 (of little importance), 3 (somewhat important), 4 (important), 5 (very important)
